# Supplementary material for: Safety and efficacy of mavacamten for treatment of hypertrophic cardiomyopathy: a systematic review and meta-analysis of randomized clinical trials
Source: Springer Nature journal article supplement (doi:10.1186/s43044-023-00328-7), 2023-01-12
Supplement: MOESM2 [file 43044_2023_328_MOESM2_ESM.pdf]

**Safety and efficacy of mavacamten for treatment of hypertrophic cardiomyopathy: A  
systematic review and meta-analysis of randomized clinical trials**

Mehrdad Rabiee Rad<sup>1</sup>, Ghazal Ghasempour Dabaghi<sup>1</sup>, Danial Habibi<sup>2</sup>

<sup>1</sup>School of Medicine, Isfahan University of Medical Science, Isfahan, Iran

<sup>2</sup>Department of Biostatistics and Epidemiology, Faculty of Health, Isfahan University of  
Medical Science, Isfahan, Iran

**Corresponding author:**

Ghazal Ghasempour Dabaghi

**Email:** ghasempoorghazal@gmail.com

### As percentage (intention-to-treat)

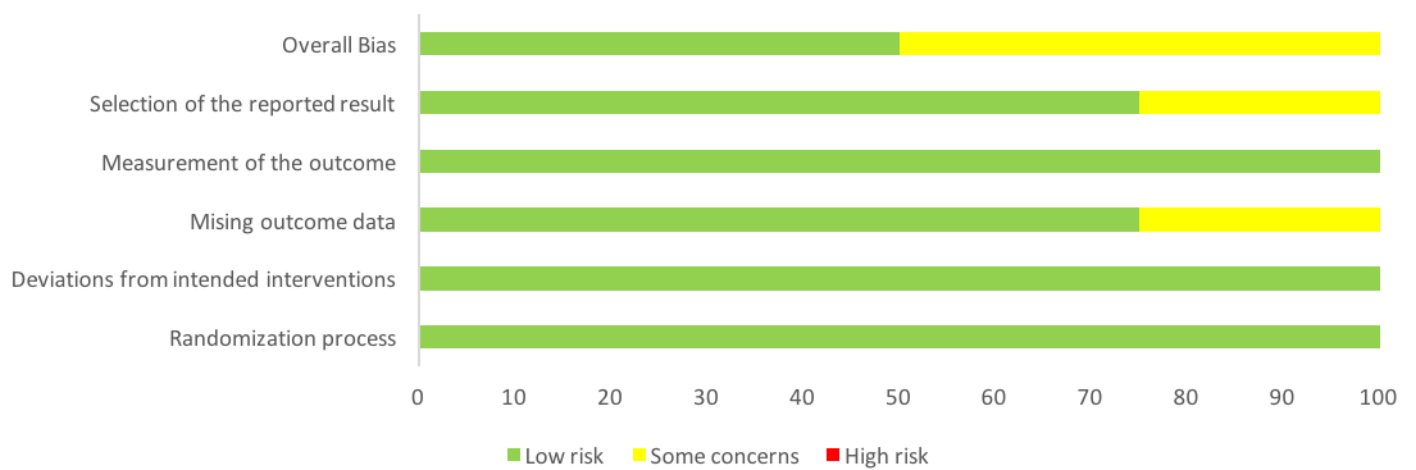

|                 | Randomisation process                                                               | Intended interventions                                                              | Missing outcome data                                                                | Measurement of the outcome                                                          | Selection of the reported result                                                     | Overall                                                                               |
|-----------------|-------------------------------------------------------------------------------------|-------------------------------------------------------------------------------------|-------------------------------------------------------------------------------------|-------------------------------------------------------------------------------------|--------------------------------------------------------------------------------------|---------------------------------------------------------------------------------------|
| Ho et al.       |  |  |  |  |  |  |
| Olivotto et al. |  |  |  |  |  |  |
| Spertus et al.  |  |  |  |  |  |  |
| Saberi et al.   |  |  |  |  |  |  |
